# Supplementary material for: Improved Glucose Homeostasis in Obese Mice Treated With Resveratrol Is Associated With Alterations in the Gut Microbiome
Source: Oxford University Press journal article supplement (doi:10.2337/db16-0680), 2016-11-30

SUPPLEMENTARY DATA

**Improved glucose homeostasis in obese mice treated with resveratrol is associated with alterations in the gut microbiome**

Miranda M. Sung<sup>1</sup>, Ty T. Kim<sup>1</sup>, Emmanuel Denou<sup>2</sup>, Carrie-Lynn M. Soltys<sup>1</sup>, Shereen M. Hamza<sup>1</sup>, Nikole J. Byrne<sup>1</sup>, Grant Masson<sup>1</sup>, Heekuk Park<sup>3</sup>, David S. Wishart<sup>4</sup>, Karen L. Madsen<sup>3</sup>, Jonathan D. Schertzer<sup>2</sup> and Jason R. B. Dyck<sup>1,\*</sup>

SUPPLEMENTARY DATA

**Supplementary Figure 1. Resveratrol feeding alters serum metabolomic profiles in obese mice.** Serum metabolic profiles of mice fed HFHS diet (HFHS) or HFHS supplemented with resveratrol (HFHS+Resv) (n = 10/group) represented by (a) 2D and (b) 3D principal component analysis (PCA). (c) Serum metabolic profiles of HFHS and HFHS+Resv mice (n = 10/group) represented by 3D partial least squares – discriminant analysis (PLS-DA). (d) Variable importance in projection (VIP) scores of serum metabolites of HFHS and HFHS+Resv mice (n = 10/group), significant metabolites are listed above the dashed line. Significant subset of metabolites by using univariate analysis for P < 0.1 was used for PCA and PLS-DA. Data normalization consisted of log transformation and Pareto scaling.

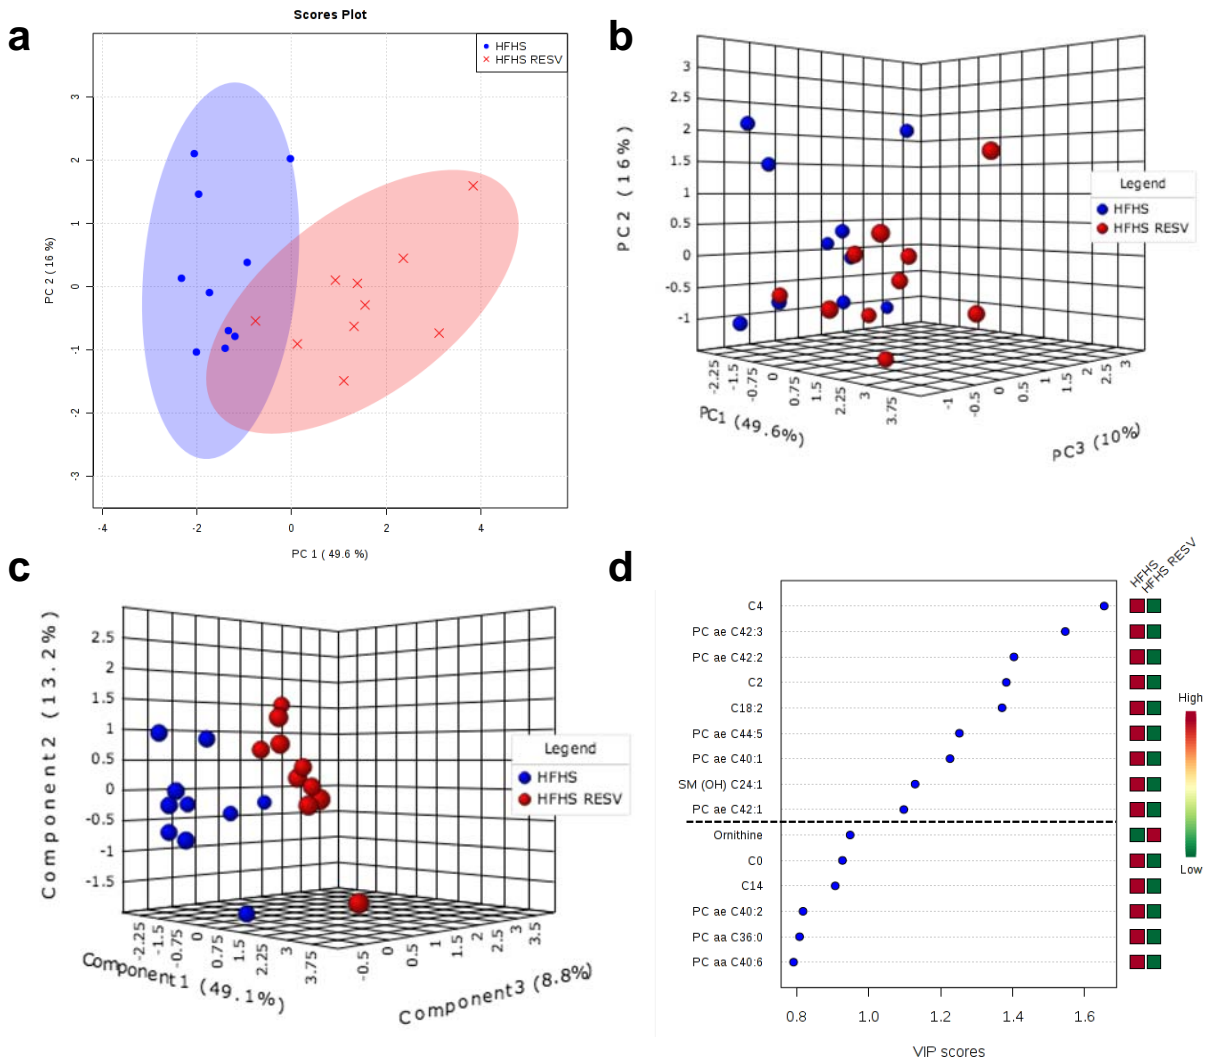

SUPPLEMENTARY DATA

**Supplementary Figure 2. Fecal microbial transfers from donor mice fed a high-fat high-sugar diet supplemented with resveratrol is sufficient to improve glucose homeostasis in obese mice.** (a) Glucose tolerance tests of high fat/high sucrose (HFHS)-fed mice at baseline prior to receiving fecal microbial transfers (Pre-FMT; n = 9) from HFHS + resveratrol-fed donor mice (HFHS+Resv Post-FMT; n = 9). (b) Glucose clearance represented by the area under the curve of the glucose tolerance tests from HFHS-fed mice prior to FMT (P) and following FMT from HFHS+Resv-fed donor mice (HR).

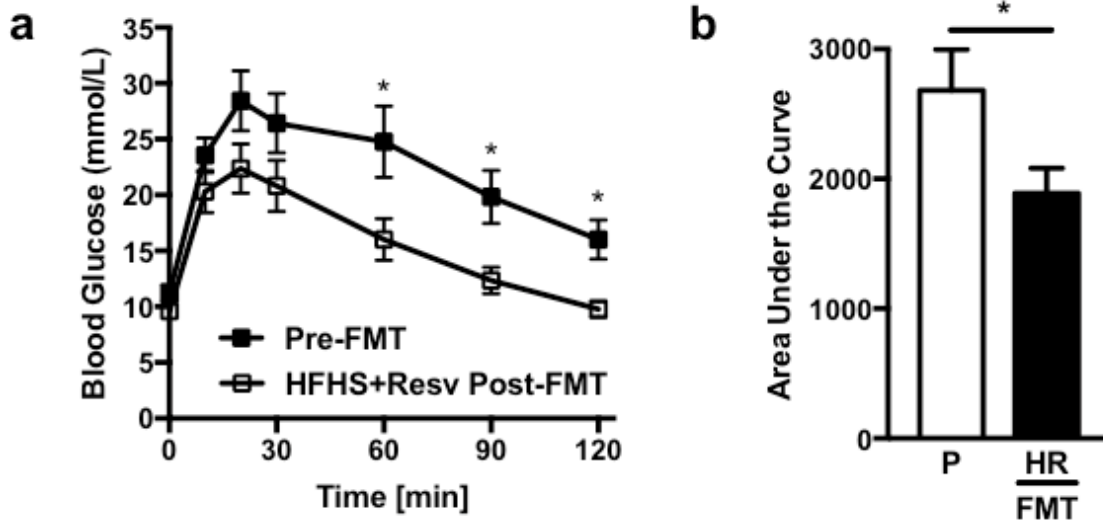

Supplement: db160680supplementarydata1.pdf [file db160680supplementarydata1.pdf]
